# Supplementary material
Source: Research Square preprint supplement (doi:10.21203/rs.3.rs-8993837/v1)
Supplement: Supplementary file 1 [file 191fb9bc2ed72ee103072211.xlsx]

## Sheet: Analysis
Race	Year	Age Adjusted Rate
American Indian or Alaska Native	1999	21.4
American Indian or Alaska Native	2000	19.5
American Indian or Alaska Native	2001	20.1
American Indian or Alaska Native	2002	21.6
American Indian or Alaska Native	2003	21.7
American Indian or Alaska Native	2004	20.3
American Indian or Alaska Native	2005	20.6
American Indian or Alaska Native	2006	18.3
American Indian or Alaska Native	2007	18
American Indian or Alaska Native	2008	14.5
American Indian or Alaska Native	2009	14.7
American Indian or Alaska Native	2010	14.8
American Indian or Alaska Native	2011	23.7
American Indian or Alaska Native	2012	25.5
American Indian or Alaska Native	2013	11.7
American Indian or Alaska Native	2014	9.6
American Indian or Alaska Native	2015	9.7
American Indian or Alaska Native	2016	12.3
American Indian or Alaska Native	2017	12.4
American Indian or Alaska Native	2018	11
American Indian or Alaska Native	2019	10.9
American Indian or Alaska Native	2020	13.3
American Indian or Alaska Native	2021	13.3
American Indian or Alaska Native	2022	10
American Indian or Alaska Native	2023	9.7
Asian or Pacific Islander	1999	16.4
Asian or Pacific Islander	2000	13.6
Asian or Pacific Islander	2001	14.4
Asian or Pacific Islander	2002	14.8
Asian or Pacific Islander	2003	13.6
Asian or Pacific Islander	2004	12.7
Asian or Pacific Islander	2005	12.6
Asian or Pacific Islander	2006	11.6
Asian or Pacific Islander	2007	11
Asian or Pacific Islander	2008	10.2
Asian or Pacific Islander	2009	9.4
Asian or Pacific Islander	2010	9.6
Asian or Pacific Islander	2011	16.6
Asian or Pacific Islander	2012	16.7
Asian or Pacific Islander	2013	7.3
Asian or Pacific Islander	2014	7.2
Asian or Pacific Islander	2015	6.7
Asian or Pacific Islander	2016	6.5
Asian or Pacific Islander	2017	7.5
Asian or Pacific Islander	2018	6.5
Asian or Pacific Islander	2019	6.7
Asian or Pacific Islander	2020	7.5
Asian or Pacific Islander	2021	7.4
Asian or Pacific Islander	2022	7.1
Asian or Pacific Islander	2023	6.1
Black or African American	1999	28.1
Black or African American	2000	25.4
Black or African American	2001	25.1
Black or African American	2002	25.1
Black or African American	2003	25.6
Black or African American	2004	24.2
Black or African American	2005	23.4
Black or African American	2006	22.3
Black or African American	2007	19.8
Black or African American	2008	18.2
Black or African American	2009	18
Black or African American	2010	16.7
Black or African American	2011	30.1
Black or African American	2012	29.3
Black or African American	2013	13.4
Black or African American	2014	12.6
Black or African American	2015	13.2
Black or African American	2016	13.2
Black or African American	2017	13.4
Black or African American	2018	13.1
Black or African American	2019	12.9
Black or African American	2020	15
Black or African American	2021	14.9
Black or African American	2022	13.2
Black or African American	2023	12.4
White	1999	11
White	2000	11.2
White	2001	11.2
White	2002	11.3
White	2003	11.5
White	2004	11.5
White	2005	11.5
White	2006	10.9
White	2007	10.3
White	2008	9.7
White	2009	9.1
White	2010	8.8
White	2011	16.4
White	2012	16.9
White	2013	8.7
White	2014	8.4
White	2015	8.8
White	2016	9
White	2017	9
White	2018	9.2
White	2019	9.3
White	2020	10.4
White	2021	11.2
White	2022	9.7
White	2023	9.1
Hispanic	1999	18.1
Hispanic	2000	16.3
Hispanic	2001	16.5
Hispanic	2002	16.5
Hispanic	2003	16.7
Hispanic	2004	16.1
Hispanic	2005	16.6
Hispanic	2006	14.5
Hispanic	2007	12.8
Hispanic	2008	12.3
Hispanic	2009	11.8
Hispanic	2010	11.3
Hispanic	2011	19.9
Hispanic	2012	20.1
Hispanic	2013	8.5
Hispanic	2014	7.5
Hispanic	2015	8
Hispanic	2016	8.2
Hispanic	2017	8.3
Hispanic	2018	8.4
Hispanic	2019	8.7
Hispanic	2020	9.3
Hispanic	2021	9.3
Hispanic	2022	8.3
Hispanic	2023	7
