# Supplementary material
Source: Research Square preprint supplement (doi:10.21203/rs.3.rs-8993837/v1)
Supplement: Supplementary file 2 [file 9d1e0114408f9ef67a0bd16a.xlsx]

## Sheet: Analysis
Variable	Year	Deaths	Age Adjusted Rate
Overall	1999	23170	13.1
Overall	2000	22943	12.8
Overall	2001	23514	12.9
Overall	2002	23969	13
Overall	2003	24849	13.2
Overall	2004	24765	13
Overall	2005	25338	13.1
Overall	2006	24277	12.3
Overall	2007	23058	11.4
Overall	2008	22163	10.8
Overall	2009	21386	10.2
Overall	2010	20919	9.8
Overall	2011	39695	18.1
Overall	2012	41715	18.5
Overall	2013	21210	9.2
Overall	2014	20858	8.8
Overall	2015	22194	9.2
Overall	2016	23120	9.4
Overall	2017	23924	9.5
Overall	2018	24624	9.5
Overall	2019	25440	9.6
Overall	2020	29040	10.8
Overall	2021	29156	11.2
Overall	2022	26917	9.9
Overall	2023	24977	9.1
Female	1999	10423	10
Female	2000	10251	9.6
Female	2001	10376	9.6
Female	2002	10353	9.4
Female	2003	10829	9.8
Female	2004	10653	9.5
Female	2005	10924	9.5
Female	2006	10257	8.8
Female	2007	9691	8.1
Female	2008	9217	7.6
Female	2009	8663	7
Female	2010	8426	6.8
Female	2011	16521	12.7
Female	2012	17043	12.8
Female	2013	8357	6.1
Female	2014	8041	5.8
Female	2015	8579	6
Female	2016	8931	6.2
Female	2017	9153	6.2
Female	2018	9458	6.3
Female	2019	9766	6.3
Female	2020	10913	7
Female	2021	10989	7.4
Female	2022	10163	6.4
Female	2023	9659	6.2
Male	1999	12747	18.3
Male	2000	12692	18.1
Male	2001	13138	18.3
Male	2002	13616	18.7
Male	2003	14020	18.9
Male	2004	14112	18.7
Male	2005	14414	18.7
Male	2006	14020	17.8
Male	2007	13367	16.6
Male	2008	12946	15.6
Male	2009	12723	14.9
Male	2010	12493	14.3
Male	2011	23174	26
Male	2012	24672	26.9
Male	2013	12853	13.8
Male	2014	12817	13.4
Male	2015	13615	13.8
Male	2016	14189	14
Male	2017	14771	14.2
Male	2018	15166	14.1
Male	2019	15674	14.2
Male	2020	18127	16.1
Male	2021	18167	16.7
Male	2022	16754	14.8
Male	2023	15318	13.3
