# Supplementary material
Source: Research Square preprint supplement (doi:10.21203/rs.3.rs-8993837/v1)
Supplement: Supplementary file 3 [file a79d4a6a9b48de9845d2a713.xlsx]

## Sheet: Analysis
Variable	Year	Deaths	Crude Rate
Young adults	1999	419	0.5
Young adults	2000	355	0.4
Young adults	2001	349	0.4
Young adults	2002	407	0.5
Young adults	2003	371	0.4
Young adults	2004	340	0.4
Young adults	2005	317	0.4
Young adults	2006	315	0.4
Young adults	2007	287	0.3
Young adults	2008	296	0.4
Young adults	2009	262	0.3
Young adults	2010	241	0.3
Young adults	2011	365	0.4
Young adults	2012	411	0.5
Young adults	2013	131	0.2
Young adults	2014	111	0.1
Young adults	2015	131	0.2
Young adults	2016	155	0.2
Young adults	2017	170	0.2
Young adults	2018	178	0.2
Young adults	2019	169	0.2
Young adults	2020	197	0.2
Young adults	2021	225	0.3
Young adults	2022	198	0.2
Young adults	2023	171	0.2
Middle age adults	1999	4242	7
Middle age adults	2000	3853	6.2
Middle age adults	2001	3907	6.1
Middle age adults	2002	3905	5.9
Middle age adults	2003	4037	5.9
Middle age adults	2004	4007	5.6
Middle age adults	2005	4110	5.6
Middle age adults	2006	3850	5.1
Middle age adults	2007	3679	4.8
Middle age adults	2008	3575	4.5
Middle age adults	2009	3596	4.5
Middle age adults	2010	3547	4.4
Middle age adults	2011	5801	7
Middle age adults	2012	5787	7
Middle age adults	2013	2453	3
Middle age adults	2014	2442	2.9
Middle age adults	2015	2582	3.1
Middle age adults	2016	2707	3.2
Middle age adults	2017	2868	3.4
Middle age adults	2018	2847	3.4
Middle age adults	2019	2838	3.4
Middle age adults	2020	3284	4
Middle age adults	2021	3332	4
Middle age adults	2022	2894	3.5
Middle age adults	2023	2618	3.2
Old age adults	1999	18509	53.2
Old age adults	2000	18735	53.5
Old age adults	2001	19258	54.6
Old age adults	2002	19657	55.3
Old age adults	2003	20441	57
Old age adults	2004	20418	56.4
Old age adults	2005	20911	57.1
Old age adults	2006	20112	54.1
Old age adults	2007	19092	50.5
Old age adults	2008	18292	47.2
Old age adults	2009	17528	44.2
Old age adults	2010	17131	42.5
Old age adults	2011	33529	81
Old age adults	2012	35517	82.3
Old age adults	2013	18626	41.7
Old age adults	2014	18305	39.6
Old age adults	2015	19481	40.8
Old age adults	2016	20258	41.1
Old age adults	2017	20886	41.1
Old age adults	2018	21599	41.2
Old age adults	2019	22433	41.5
Old age adults	2020	25559	45.9
Old age adults	2021	25599	45.8
Old age adults	2022	23825	41.2
Old age adults	2023	22188	37.4
