# Supplementary material
Source: Research Square preprint supplement (doi:10.21203/rs.3.rs-8993837/v1)
Supplement: Supplementary file 4 [file aa6ecb30792254a3283c618c.xlsx]

## Sheet: Sheet1
Place of Death	Deaths	% of Total Deaths
Medical Facility - Inpatient	626168	0.466
Medical Facility - Outpatient or ER	78509	0.058
Medical Facility - Dead on Arrival	5354	0.004
Medical Facility - Status unknown	1245	0.001
Decedent's home	256836	0.191
Hospice facility	52033	0.039
Nursing home/long term care	280057	0.208
