# Supplementary material
Source: Research Square preprint supplement (doi:10.21203/rs.3.rs-8993837/v1)
Supplement: Supplementary file 5 [file aa8723333dae58c38df22a3e.xlsx]

## Sheet: Analysis
Variable	Year	Age Adjusted Rate
Metropolitan	1999	13.4
Metropolitan	2000	12.9
Metropolitan	2001	13
Metropolitan	2002	13
Metropolitan	2003	13.2
Metropolitan	2004	13.1
Metropolitan	2005	13
Metropolitan	2006	12.3
Metropolitan	2007	11.3
Metropolitan	2008	10.6
Metropolitan	2009	9.9
Metropolitan	2010	9.6
Metropolitan	2011	17.9
Metropolitan	2012	18.3
Metropolitan	2013	9
Metropolitan	2014	8.7
Metropolitan	2015	9
Metropolitan	2016	9.2
Metropolitan	2017	9.2
Metropolitan	2018	9.3
Metropolitan	2019	9.3
Metropolitan	2020	10.5
Non-metropolitan	1999	11.8
Non-metropolitan	2000	12.5
Non-metropolitan	2001	12.5
Non-metropolitan	2002	12.9
Non-metropolitan	2003	13.3
Non-metropolitan	2004	12.8
Non-metropolitan	2005	13.2
Non-metropolitan	2006	12.2
Non-metropolitan	2007	11.8
Non-metropolitan	2008	11.7
Non-metropolitan	2009	11.3
Non-metropolitan	2010	10.7
Non-metropolitan	2011	19.1
Non-metropolitan	2012	19.6
Non-metropolitan	2013	10
Non-metropolitan	2014	9.7
Non-metropolitan	2015	10
Non-metropolitan	2016	10.4
Non-metropolitan	2017	10.6
Non-metropolitan	2018	10.5
Non-metropolitan	2019	11
Non-metropolitan	2020	12.6
