# Supplementary material
Source: Research Square preprint supplement (doi:10.21203/rs.3.rs-8993837/v1)
Supplement: Supplementary file 6 [file e22cd05304fb517cd0146a90.xlsx]

## Sheet: Analysis
Census Region	Year	Age Adjusted Rate
Census Region 1: Northeast	1999	13.8
Census Region 1: Northeast	2000	13.5
Census Region 1: Northeast	2001	13.4
Census Region 1: Northeast	2002	13.3
Census Region 1: Northeast	2003	13.4
Census Region 1: Northeast	2004	13.2
Census Region 1: Northeast	2005	13.1
Census Region 1: Northeast	2006	12.1
Census Region 1: Northeast	2007	11.5
Census Region 1: Northeast	2008	10.4
Census Region 1: Northeast	2009	9.9
Census Region 1: Northeast	2010	9.6
Census Region 1: Northeast	2011	16.5
Census Region 1: Northeast	2012	17
Census Region 1: Northeast	2013	9.1
Census Region 1: Northeast	2014	8.5
Census Region 1: Northeast	2015	8.9
Census Region 1: Northeast	2016	8.9
Census Region 1: Northeast	2017	8.7
Census Region 1: Northeast	2018	8.9
Census Region 1: Northeast	2019	8.9
Census Region 1: Northeast	2020	9.9
Census Region 1: Northeast	2021	9.7
Census Region 1: Northeast	2022	8.6
Census Region 1: Northeast	2023	8.1
Census Region 2: Midwest	1999	13
Census Region 2: Midwest	2000	12.9
Census Region 2: Midwest	2001	13.1
Census Region 2: Midwest	2002	13.1
Census Region 2: Midwest	2003	13.4
Census Region 2: Midwest	2004	13.2
Census Region 2: Midwest	2005	13.5
Census Region 2: Midwest	2006	12.8
Census Region 2: Midwest	2007	12.2
Census Region 2: Midwest	2008	11.5
Census Region 2: Midwest	2009	10.7
Census Region 2: Midwest	2010	10.5
Census Region 2: Midwest	2011	19.6
Census Region 2: Midwest	2012	19.9
Census Region 2: Midwest	2013	10
Census Region 2: Midwest	2014	9.7
Census Region 2: Midwest	2015	10.2
Census Region 2: Midwest	2016	10.2
Census Region 2: Midwest	2017	10.6
Census Region 2: Midwest	2018	10.6
Census Region 2: Midwest	2019	10.7
Census Region 2: Midwest	2020	12.6
Census Region 2: Midwest	2021	12.7
Census Region 2: Midwest	2022	10.9
Census Region 2: Midwest	2023	10.5
Census Region 3: South	1999	13
Census Region 3: South	2000	12.8
Census Region 3: South	2001	12.9
Census Region 3: South	2002	12.8
Census Region 3: South	2003	13
Census Region 3: South	2004	12.5
Census Region 3: South	2005	12.7
Census Region 3: South	2006	12.1
Census Region 3: South	2007	11.1
Census Region 3: South	2008	10.5
Census Region 3: South	2009	10.1
Census Region 3: South	2010	9.7
Census Region 3: South	2011	17.5
Census Region 3: South	2012	17.8
Census Region 3: South	2013	8.8
Census Region 3: South	2014	8.6
Census Region 3: South	2015	8.8
Census Region 3: South	2016	9.2
Census Region 3: South	2017	9.3
Census Region 3: South	2018	9.5
Census Region 3: South	2019	9.4
Census Region 3: South	2020	10.7
Census Region 3: South	2021	11.4
Census Region 3: South	2022	10
Census Region 3: South	2023	9.1
Census Region 4: West	1999	12.7
Census Region 4: West	2000	12
Census Region 4: West	2001	12.2
Census Region 4: West	2002	12.9
Census Region 4: West	2003	13.2
Census Region 4: West	2004	13.3
Census Region 4: West	2005	13
Census Region 4: West	2006	12
Census Region 4: West	2007	11.1
Census Region 4: West	2008	10.6
Census Region 4: West	2009	9.8
Census Region 4: West	2010	9.5
Census Region 4: West	2011	18.8
Census Region 4: West	2012	19.7
Census Region 4: West	2013	9
Census Region 4: West	2014	8.7
Census Region 4: West	2015	8.9
Census Region 4: West	2016	9.2
Census Region 4: West	2017	9.2
Census Region 4: West	2018	8.9
Census Region 4: West	2019	9.4
Census Region 4: West	2020	10
Census Region 4: West	2021	10.8
Census Region 4: West	2022	9.6
Census Region 4: West	2023	8.7
