# Supplementary material
Source: Research Square preprint supplement (doi:10.21203/rs.3.rs-8993837/v1)
Supplement: Supplementary file 7 [file e778116557fc4720023e07e0.xlsx]

## Sheet: Sheet1
State	Deaths	Age Adjusted Rate
West Virginia	13070	39.2
North Dakota	4569	36.1
District of Columbia	3071	36
South Carolina	24723	34.9
California	178344	34.5
Ohio	66150	34.5
North Carolina	47477	33.7
Indiana	33222	33.5
Maryland	27353	32.3
Tennessee	30512	31.7
Oklahoma	18216	31.6
Texas	96735	31.3
Kentucky	20258	31
Minnesota	26158	30.6
Rhode Island	5864	30.1
Mississippi	13166	30.1
Nebraska	9049	29.5
Pennsylvania	69126	29
Wisconsin	27098	28.4
Washington	27947	28.3
South Dakota	4084	27.7
Michigan	44423	27.6
Alabama	20334	27.3
Delaware	4001	27.3
Hawaii	6293	27
Virginia	30800	27
Georgia	32820	27
Missouri	26308	26.9
Oregon	16720	26.2
New Hampshire	5468	25.8
Maine	6330	25.6
Illinois	49739	25.6
New York	80692	25.4
Vermont	2725	25.4
Iowa	14373	25.3
Louisiana	16512	25
New Jersey	35796	25
Alaska	1459	24.8
Massachusetts	27810	24.6
Connecticut	15245	24.2
Arkansas	11086	23.6
Colorado	14796	23.1
Kansas	10718	23
Idaho	4913	22.1
Florida	77682	20.8
New Mexico	6272	20.5
Montana	3220	18.9
Wyoming	1502	18.7
Utah	5361	18.6
Arizona	18487	18.6
Nevada	6346	17.8
